# Supplementary material for: Barthel Index-based functional status as a prognostic factor in young and middle-aged adults with newly diagnosed gastric, colorectal and lung cancer: a multicentre retrospective cohort study
Source: HighWire-hosted journal article supplement (doi:10.1136/bmjopen-2020-046681), 2021-04-01
Supplement: bmjopen-2020-046681supp002_data_supplement.pdf [file bmjopen-2020-046681supp002_data_supplement.pdf]

**Supplementary table 2.** Adjusted hazard ratios and confidence intervals for all-cause mortality in gastric cancer, colorectal cancer, and lung cancer patients aged 18–59 years

|                                      | Gastric cancer (n=1234) |               |                          |         | Colorectal cancer (n=1470) |               |                        |         | Lung cancer (n=1049) |               |                        |         |
|--------------------------------------|-------------------------|---------------|--------------------------|---------|----------------------------|---------------|------------------------|---------|----------------------|---------------|------------------------|---------|
|                                      | n                       | Mortality (%) | aHR (95% CI)             | P value | n                          | Mortality (%) | aHR (95% CI)           | P value | n                    | Mortality (%) | aHR (95% CI)           | P value |
| <b>Sex</b>                           |                         |               |                          |         |                            |               |                        |         |                      |               |                        |         |
| Female                               | 440                     | 137 (31.1)    | Reference                |         | 706                        | 159 (22.5)    | Reference              |         | 376                  | 160 (42.6)    | Reference              |         |
| Male                                 | 794                     | 201 (25.3)    | 0.94 (0.75–1.16)         | 0.55    | 764                        | 210 (27.5)    | 1.22 (0.99–1.50)       | 0.061   | 673                  | 407 (60.5)    | 1.79 (1.48–2.16)       | <0.001  |
| <b>Comorbidities<sup>a</sup></b>     |                         |               |                          |         |                            |               |                        |         |                      |               |                        |         |
| None                                 | 1072                    | 283 (26.4)    | Reference                |         | 1263                       | 294 (23.3)    | Reference              |         | 818                  | 429 (52.4)    | Reference              |         |
| Moderate                             | 146                     | 49 (33.6)     | 1.27 (0.93–1.72)         | 0.131   | 188                        | 68 (36.2)     | 1.24 (0.95–1.63)       | 0.115   | 213                  | 130 (61.0)    | 1.25 (1.03–1.52)       | 0.027   |
| Severe                               | 16                      | 6 (37.5)      | 0.60 (0.27–1.37)         | 0.23    | 19                         | 7 (36.8)      | 1.47 (0.69–3.11)       | 0.32    | 18                   | 8 (44.4)      | 1.71 (0.85–3.48)       | 0.135   |
| <b>Cancer stage</b>                  |                         |               |                          |         |                            |               |                        |         |                      |               |                        |         |
| Localized                            | 708                     | 13 (1.8)      | Reference                |         | 643                        | 20 (3.1)      | Reference              |         | 277                  | 23 (8.3)      | Reference              |         |
| Regional                             | 253                     | 86 (34.0)     | 21.38<br>(11.93–38.31)   | <0.001  | 503                        | 100 (19.9)    | 7.01<br>(4.33–11.33)   | <0.001  | 274                  | 133 (48.5)    | 6.57<br>(4.22–10.25)   | <0.001  |
| Distant                              | 273                     | 239 (87.5)    | 117.79<br>(67.07–206.87) | <0.001  | 324                        | 249 (76.9)    | 46.96<br>(29.68–74.30) | <0.001  | 498                  | 411 (82.5)    | 19.36<br>(12.66–29.61) | <0.001  |
| <b>Tumor histology</b>               |                         |               |                          |         |                            |               |                        |         |                      |               |                        |         |
| Non-small cell carcinoma             | –                       | –             | –                        | –       | –                          | –             | –                      | –       | 943                  | 476 (50.5)    | Reference              |         |
| Small cell carcinoma                 | –                       | –             | –                        | –       | –                          | –             | –                      | –       | 106                  | 91 (85.8)     | 1.47 (1.17–1.85)       | 0.001   |
| <b>Functional status<sup>b</sup></b> |                         |               |                          |         |                            |               |                        |         |                      |               |                        |         |
| No disability                        | 1162                    | 300 (25.8)    | Reference                |         | 1365                       | 315 (23.1)    | Reference              |         | 948                  | 485 (51.2)    | Reference              |         |
| Moderate disability                  | 51                      | 21 (41.2)     | 1.47 (0.94–2.29)         | 0.090   | 70                         | 33 (47.1)     | 1.76 (1.22–2.54)       | 0.002   | 53                   | 42 (79.2)     | 1.91 (1.39–2.62)       | <0.001  |
| Severe disability                    | 21                      | 17 (81.0)     | 3.82 (2.32–6.30)         | <0.001  | 35                         | 21 (60.0)     | 3.14 (2.01–4.91)       | <0.001  | 48                   | 40 (83.3)     | 2.39 (1.73–3.30)       | <0.001  |

Mortality is expressed as the number of patients (percentage of all patients at risk as indicated in the leftmost column). aHRs were calculated from Cox proportional hazards models that adjusted for age, sex, comorbidities, cancer stage, and functional status. Tumor histology was also adjusted for lung cancer, but not for gastric and colorectal cancer.

<sup>a</sup> Comorbidities were measured using the Charlson Comorbidity Index, with 0 points indicating none, 1–2 points indicating moderate comorbidities, and ≥3 points indicating severe comorbidities. <sup>b</sup> Functional status was measured using the Barthel Index, with 100 points indicating no disability, 60–95 points indicating moderate disability, and 0–55 indicating severe disability. aHR, adjusted hazard ratio; CI, confidence interval.
